# Supplementary material for: Evaluating Forest Site Quality Using the Biomass Potential Productivity Approach
Source: MDPI journal article supplement (doi:10.3390/f15010023), 2023-12-21
Supplement: s1 [file s1]

productivity ( $BPP$ )

### Supplementary Information S1: Method of biomass potential

The calculation of the biomass potential productivity ( $BPP$ ) is searching  $\tilde{S}$  that maximizes the objective function from a given interval of stand density index ( $S_{\min}, S_{\max}$ ), corresponding to the maximum annual growth of biomass.

The method of searching  $\tilde{S}$  we utilized the golden section method [24]. The detailed calculation of  $BPP$  is as follows:

- (1) Given  $[S_{\min}, S_{\max}]$ , Calculation of initial values of stand density index ( $S$ ) at 4 points:

$$\begin{aligned} S_1^{(Age_0)} &= S_{\min} \\ S_2^{(Age_0)} &= S_{\min} + 0.382(S_{\max} - S_{\min}) \\ S_3^{(Age_0)} &= S_{\min} + 0.618(S_{\max} - S_{\min}) \\ S_4^{(Age_0)} &= S_{\max} \end{aligned} \quad (S1)$$

- (2) The  $BI$  values of the four points of segmentation ( $BI_1^{(Age_0)}, BI_2^{(Age_0)}, BI_3^{(Age_0)}, BI_4^{(Age_0)}$ ) corresponding to  $S_1^{(Age_0)}, S_2^{(Age_0)}, S_3^{(Age_0)}, S_4^{(Age_0)}$ , at the  $t^{\text{th}}$  iteration is obtained using **subprogram A** (see below).

$$\begin{aligned} BI_1^{(Age_0)} &= f(L, Age_0, S_1^{(Age_0)}, \hat{\Phi}_G, \hat{\Phi}_B) \\ BI_2^{(Age_0)} &= f(L, Age_0, S_2^{(Age_0)}, \hat{\Phi}_G, \hat{\Phi}_B) \\ BI_3^{(Age_0)} &= f(L, Age_0, S_3^{(Age_0)}, \hat{\Phi}_G, \hat{\Phi}_B) \\ BI_4^{(Age_0)} &= f(L, Age_0, S_4^{(Age_0)}, \hat{\Phi}_G, \hat{\Phi}_B) \end{aligned} \quad (S2)$$

Where  $L$  is the site group,  $BI$  is the biomass annual growth.

- (3) If  $BI_2^{(Age_0)} > BI_3^{(Age_0)}$  and  $|BI_2^{(Age_0)} - BI_3^{(Age_0)}| > e$ , transmute

$$\begin{aligned} S_1^{(Age_1)} &= S_1^{(Age_0)} \\ S_4^{(Age_1)} &= S_3^{(Age_0)} \\ S_2^{(Age_1)} &= S_1^{(Age_1)} + 0.382(S_4^{(Age_1)} - S_1^{(Age_1)}) \\ S_3^{(Age_1)} &= S_1^{(Age_1)} + 0.618(S_4^{(Age_1)} - S_1^{(Age_1)}) \end{aligned} \quad (S3)$$

where  $Age_1 = Age_0 + 1$ .

- Or if  $BI_2^{(Age_0)} < BI_3^{(Age_0)}$  and  $|BI_2^{(Age_0)} - BI_3^{(Age_0)}| > e$ , transmute

$$\begin{aligned} S_1^{(Age_1)} &= S_2^{(Age_0)} \\ S_4^{(Age_1)} &= S_4^{(Age_0)} \\ S_2^{(Age_1)} &= S_1^{(Age_1)} + 0.382(S_4^{(Age_1)} - S_1^{(Age_1)}) \\ S_3^{(Age_1)} &= S_1^{(Age_1)} + 0.618(S_4^{(Age_1)} - S_1^{(Age_1)}) \end{aligned} \quad (S4)$$

where  $Age_1 = Age_0 + 1$ .

and one must go back to (2) for the next iteration, otherwise the calculation stops.

$$BPP = (BI_2^{Age_0} + BI_3^{Age_0}) / 2, S = (S_2^{Age_0} + S_3^{Age_0}) / 2 \quad (S5)$$

The computational process of **Subprogram A**:

- (1) computing  $N_0$  and  $B_0$  at  $Age_0$ :

- a) Given  $Age_0$ ,  $S_0$  and  $\hat{\Phi}_G$ , compute  $G_0$  using the following equation:

$$G_0 = f_G(Age_0, S_0, \hat{\Phi}_G) \quad (S6)$$

where  $G_0$  is the basal area increment of different stand type in  $Age_0$ ;  $Age_0$  is the Initial age;  $S_0$  is the stand density that maximum objective function.  $\hat{\Phi}_G$  is the model parameter.

- b) Given  $G_0, S_0$  compute  $N_0$  and  $D_0$ :

$$\begin{cases} G_0 = \pi D_0^2 N_0 / 40000 \\ S_0 = N_0 (D_0 / 20)^\beta = N_0 (D_0 / 20)^{1.605} \end{cases} \quad (S7)$$

The estimates of  $D_0$  and  $N_0$  are:

$$D_0 = \left( \frac{40000 G_0}{\pi S_0 (20)^{1.605}} \right)^{1/(1.605-1)}, N_0 = G_0 / (\pi D_0^2 / 40000) \quad (S8)$$

where  $D_0$  is the mean of the diameter at breast height;  $N_0$  is the initial number of trees in the stand.

- c) Given  $Age_0$ , and  $S_0$ , compute  $B_0$  using the following equation:

$$B_0 = f_B(Age_0, S_0, \hat{\Phi}_B) \quad (S9)$$

where  $B_0$  is the biomass increment of one stand type at  $Age_0$ ;  $Age_0$  is the Initial age;  $S_0$  is the stand density index that maximum objective function.  $\hat{\Phi}_B$  is the model parameter.

**(2) computing  $B_1$  at  $Age_1$  (  $Age_0 + 1$ ):**

In our study, it was assumed that the number of trees is the same in each year (  $N_1 = N_0$  ). We computed  $B_1$  according to the  $Age_1 = Age_0 + 1$ .

- a) Given  $Age_1$ ,  $N_1$ , and  $\hat{\Phi}_G$ , using dichotomy iteration algorithm to compute  $S_1$  using the following equation [24,25]:

$$f_G(Age_1, S_1, \hat{\Phi}_G) - \pi / 100 (S_1 / N_1)^{2/1.605} N_1 = 0 \quad (S10)$$

- b) Given  $Age_1$ ,  $S_1$ , and  $\hat{\Phi}_B$ , compute  $B_1$  as follows:

$$B_1 = f_B(Age_1, S_1, \hat{\Phi}_B) \quad (S11)$$

**(3) Compute  $BI$  using the following equation:**

$$BI = B_1 - B_0 = f_B(Age_1, S_1, \hat{\Phi}_B) - f_B(Age_0, S_0, \hat{\Phi}_B) \quad (S12)$$

## Supplementary Information S2: Method of biomass realistic productivity (BRP)

The computational procedures of *BRP* are similar to *BPP*.  $S$  from field surveys, should be provided for the *BRP* calculation. The stand density index (  $S_0$  ) for biomass realistic productivity in  $Age_0$  is the measured data from the sample plots. We compute biomass realistic productivity through **Subprogram A**.
